# Supplementary material for: Emerging investigator series: automated single-nanoparticle quantification and classification: a holistic study of particles into and out of wastewater treatment plants in Switzerland
Source: Environ Sci Nano. 2021 Mar 23;8(5):1211–25. doi: 10.1039/d0en01066a (PMC8136323; doi:10.1039/d0en01066a)
Supplement: EN-008-D0EN01066A-s002 [file EN-008-D0EN01066A-s002.xlsx]

## Sheet: Particle data
Sensitivity (counts/fg)*	Al	Ti	V	Cr	Fe	Mn	Ni	Cu	Zn	Y	Zr	Nb	Mo	Rh	Pd	Ag	Sn	Sb	Ba	La	Ce	Nd	Er	Hf	Ta	W	Pt	Au	Tl	Pb	Bi	Th	U
I5	0.42	0.54	22.35	17.06	0.81	24.73	7.13	27.25	13.74	64.09	33.44	67.63	17.75	75.28	17.11	80.84	53.27	86.36	11.49	101.12	102.87	28.88	29.96	23.28	84.41	71.46	79.86	47.01	54.91	68.58	76.96	72.19	62.84
I4	0.34	0.68	17.5	12.73	0.57	19.27	5.53	22	12.33	70.1	36.67	74.66	19.69	84.5	19.26	93.91	60.51	98.74	12.72	113.85	116.35	34.06	40.68	33.84	124.63	107.15	94.11	53.31	90.77	98.31	129.38	132.42	132.35
I3	0.54	0.78	23.54	17.39	0.73	26.11	7.54	32.22	17.08	87.72	45.85	93.15	24.53	104.9	23.89	113.46	74.08	121.9	15.03	133.32	125.52	38.92	43.29	34.85	127.41	108.76	101.1	59.2	88.17	106.38	124.76	123.05	113.34
I2	0.49	0.82	22.24	15.87	0.73	24.55	7.07	28.71	15.95	82.82	43.29	87.93	23.15	98.99	22.54	109.67	70.27	115	14.53	129.58	126.72	38.36	44.47	36.5	134.04	114.91	105.96	61.44	95.67	111.8	135.99	137.23	130.29
I1	0.55	0.62	20.45	16.6	0.66	22.59	6.5	26.27	13.74	61.5	32.09	64.87	17.02	72.15	16.4	77.32	51.34	82.7	10.77	94.9	93.97	27.19	28.54	22.31	81	68.68	76.98	45.06	53.28	68.52	74.82	70.85	60.53
E5	0.45	0.6	19.49	16.14	0.6	21.54	6.21	25.47	13.46	59.51	31.05	62.77	16.47	69.82	15.87	74.55	49.84	80.03	10.7	94.21	96.51	26.91	27.93	21.71	78.7	66.63	74.4	43.82	51.22	64.03	71.8	67.37	58.58
E4	0.53	0.82	23.46	17.2	0.73	25.98	7.5	31.74	17.15	87.03	45.49	92.44	24.35	104.14	23.72	112.51	73.75	121.08	15.26	135.46	130.29	39.58	44.15	35.6	130.18	111.16	103.02	60.15	90.29	108.33	127.81	126.28	116.76
E3	0.39	0.77	19.78	14.5	0.64	21.8	6.26	25.17	14.03	77.18	40.38	82.2	21.68	93.04	21.2	102.51	65.96	108.74	13.82	123.36	122.62	36.66	42.97	35.44	130.3	111.82	100.42	56.75	93.71	104.06	133.34	135.28	132.95
E2	0.4	0.79	20.36	14.86	0.66	22.44	6.45	26.05	14.24	77.81	40.7	82.85	21.84	93.73	21.36	102.77	66.15	109.49	13.93	124.13	122.56	36.73	42.54	34.9	128.14	109.84	99.17	56.28	91.39	102.73	129.88	130.99	127.52
E1	0.31	0.57	18.78	15.62	0.57	20.78	6	25.01	13.19	59.13	30.86	62.41	16.39	69.52	15.81	73.93	49.8	79.81	10.28	90.56	89.63	25.91	27.05	21.09	76.53	64.84	73.95	43.89	50.09	63.32	70.28	66.27	57.36
* Sensitivities are quite different for W1,W5 samples compared to W2, W3, W4 samples because these were measured on two different days with slightly different instrument conditions.
Lamda (counts)	Al	Ti	V	Cr	Fe	Mn	Ni	Cu	Zn	Y	Zr	Nb	Mo	Rh	Pd	Ag	Sn	Sb	Ba	La	Ce	Nd	Er	Hf	Ta	W	Pt	Au	Tl	Pb	Bi	Th	U
I5	9.99	1.87	2.45	1.54	257.01	143.63	3.95	77.02	87.68	0.44	1.05	0.99	2.98	0.01	0.08	0.58	6.08	1.42	22.81	1.39	1.13	0.25	0.02	0.03	0.13	11.14	0.1	0.14	0.15	9.86	3.75	0.23	1.78
I4	1.27	0.25	1.06	0.7	43.28	49.7	0.84	36.18	78.16	0.3	0.72	0.03	5.8	0.02	0.16	0.15	4.95	1.7	6.77	0.23	0.3	0.04	0	0.03	0	4.15	0.15	0.16	0.01	4.2	3.46	0.02	2.98
I3	4.56	0.71	1.23	1.76	24.48	74.46	1.34	68.43	152.53	0.5	0.82	0.15	2.83	0.03	0.2	0.39	7.95	3.5	24.75	1.72	0.71	0.12	0.01	0.03	0.03	1.39	0.17	0.17	0.05	19.45	3.69	0.07	4.5
I2	0.6	0.12	1.18	0.59	231.67	33.42	0.31	5.29	23.68	0.07	0.11	0.02	0.19	0	0.02	0.04	3.31	0.26	4.44	0.13	0.38	0.03	0	0	0	0.43	0.16	0.22	0.01	0.83	0.37	0.02	0.54
I1	0.75	0.05	0.42	0.21	8.87	5.67	0.17	5.36	8.22	0.06	0.12	0.02	0.15	0	0.02	0.05	2.74	0.25	2.03	0.59	0.53	0.02	0	0	0.01	0.18	0.06	0.16	0	0.64	0.22	0.02	0.47
E5	0.1	0.02	0.45	0.22	7.31	103.48	0.71	13.31	33.2	0.14	0.07	0.02	2.46	0.01	0.06	0.04	2.63	1.02	7.73	0.13	0.05	0.01	0	0	0	5.53	0.07	0.27	0.05	0.82	0.07	0.04	0.36
E4	0.17	0.01	0.29	0.4	2.33	41.93	1.16	25.01	49.51	0.21	0.1	0.02	4.88	0.01	0.11	0.2	3.27	2.16	4.11	0.07	0.56	0.01	0	0	0	2.91	0.18	1.63	0.01	4.33	0.14	0	2.25
E3	0.17	0.02	0.23	0.64	1.51	160.66	0.99	17.65	52.97	0.22	0.09	0.02	1.22	0.02	0.12	0.17	3.23	0.95	12.14	0.15	0.31	0.02	0	0	0	0.76	0.2	0.5	0.01	10.51	1.56	0.01	1.13
E2	0.34	0.02	0.26	0.3	1.26	37.12	0.68	26.9	91.2	0.27	0.11	0.03	50.36	0.02	0.15	0.04	3.03	0.98	18.51	0.17	0.24	0.01	0	0	0	2.11	0.15	0.31	0.01	1.06	0.05	0	2.66
E1	1.63	0.18	3.63	0.7	63.67	29.77	1.21	17.66	34.06	0.42	0.25	0.05	1.24	0.02	0.13	0.07	2.77	1.19	12.28	1.08	1.11	0.08	0.01	0	0.01	0.53	0.1	0.51	0.01	1.2	0.42	0.09	1.36
Alpha for setting L_C	Al	Ti	V	Cr	Fe	Mn	Ni	Cu	Zn	Y	Zr	Nb	Mo	Rh	Pd	Ag	Sn	Sb	Ba	La	Ce	Nd	Er	Hf	Ta	W	Pt	Au	Tl	Pb	Bi	Th	U
I5	0.002	0.002	0.0001	0.0002	0.001	0.0005	2e-05	0.001	0.002	2e-05	0.0005	5e-05	1e-05	1e-05	1e-05	0.0001	0.0005	5e-05	0.0002	0.0002	0.0005	5e-05	1e-05	1e-05	1e-05	0.0002	1e-05	1e-05	2e-05	0.0005	0.0005	5e-05	1e-05
I4	0.0002	0.001	1e-05	1e-05	0.0001	5e-05	1e-05	0.0001	0.0001	1e-05	0.0005	2e-05	1e-05	1e-05	1e-05	2e-05	0.0002	5e-05	1e-05	2e-05	2e-05	1e-05	1e-05	1e-05	1e-05	1e-05	1e-05	1e-05	1e-05	5e-05	5e-05	1e-05	1e-05
I3	0.001	0.002	5e-05	0.0001	0.0005	0.0002	2e-05	0.0005	0.0002	2e-05	0.0005	0.0001	1e-05	1e-05	1e-05	0.0001	0.0002	1e-05	2e-05	0.0002	0.0005	2e-05	1e-05	1e-05	1e-05	2e-05	1e-05	1e-05	1e-05	0.0002	0.0001	2e-05	1e-05
I2	0.0001	0.0001	1e-05	1e-05	5e-05	1e-05	1e-05	5e-05	5e-05	1e-05	5e-05	1e-05	1e-05	1e-05	1e-05	1e-05	2e-05	1e-05	1e-05	1e-05	2e-05	1e-05	1e-05	1e-05	1e-05	1e-05	1e-05	1e-05	1e-05	2e-05	2e-05	1e-05	1e-05
I1	0.0005	0.0002	1e-05	2e-05	0.0002	2e-05	1e-05	0.0002	0.0001	1e-05	5e-05	1e-05	1e-05	1e-05	1e-05	1e-05	2e-05	1e-05	1e-05	0.0005	0.0005	1e-05	1e-05	1e-05	1e-05	1e-05	1e-05	1e-05	1e-05	5e-05	1e-05	1e-05	1e-05
E5	2e-05	2e-05	1e-05	1e-05	0.0005	0.0002	1e-05	2e-05	0.0001	1e-05	1e-05	1e-05	1e-05	1e-05	1e-05	1e-05	1e-05	1e-05	1e-05	1e-05	1e-05	1e-05	1e-05	1e-05	1e-05	1e-05	1e-05	1e-05	1e-05	5e-05	1e-05	1e-05	1e-05
E4	1e-05	1e-05	1e-05	1e-05	0.0001	2e-05	1e-05	1e-05	1e-05	1e-05	1e-05	1e-05	1e-05	1e-05	1e-05	1e-05	1e-05	1e-05	1e-05	1e-05	1e-05	1e-05	1e-05	1e-05	1e-05	1e-05	1e-05	1e-05	1e-05	2e-05	1e-05	1e-05	1e-05
E3	1e-05	1e-05	1e-05	1e-05	0.0001	1e-05	1e-05	1e-05	1e-05	1e-05	1e-05	1e-05	1e-05	1e-05	1e-05	1e-05	1e-05	1e-05	1e-05	1e-05	1e-05	1e-05	1e-05	1e-05	1e-05	1e-05	1e-05	1e-05	1e-05	1e-05	1e-05	1e-05	1e-05
E2	1e-05	1e-05	1e-05	1e-05	5e-05	1e-05	1e-05	1e-05	1e-05	1e-05	1e-05	1e-05	1e-05	1e-05	1e-05	1e-05	1e-05	1e-05	1e-05	1e-05	1e-05	1e-05	1e-05	1e-05	1e-05	1e-05	1e-05	1e-05	1e-05	1e-05	1e-05	1e-05	1e-05
E1	0.001	0.0002	2e-05	5e-05	0.002	0.001	1e-05	0.0002	0.0002	1e-05	0.0001	2e-05	1e-05	1e-05	1e-05	1e-05	2e-05	1e-05	1e-05	0.0005	0.0005	2e-05	1e-05	1e-05	1e-05	1e-05	1e-05	1e-05	1e-05	5e-05	2e-05	1e-05	1e-05
L_C,sp (counts)	Al	Ti	V	Cr	Fe	Mn	Ni	Cu	Zn	Y	Zr	Nb	Mo	Rh	Pd	Ag	Sn	Sb	Ba	La	Ce	Nd	Er	Hf	Ta	W	Pt	Au	Tl	Pb	Bi	Th	U
I5	11.79	5.98	9.23	7.36	57.14	47.05	12.59	32.16	31.89	6.34	5.88	7.24	11.8	3.83	4.69	5.86	11.28	8.11	21.55	7.13	6.03	5.02	3.99	4.22	5.12	15.77	4.84	5.17	5.08	13.82	9.3	4.95	9.88
I4	6.91	3.68	8.36	7.42	30.37	34.23	7.81	27.99	39.91	6	5.2	4.11	15.16	4.05	5.24	5.06	11.32	8.62	16.11	5.51	5.81	4.27	3.63	4.16	3.61	13.33	5.19	5.28	3.84	11.94	11.1	3.95	11.79
I3	9.3	4.29	7.76	8.23	20.61	37	8.67	33.1	51.93	6.54	5.42	4.29	11.58	4.12	5.52	5.25	13.7	12.5	26.64	7.64	5.18	4.88	3.88	4.17	4.22	8.79	5.37	5.34	4.45	20.09	10.72	4.52	13.73
I2	5.92	4.09	8.64	7.08	70.64	31.75	6.06	13.05	24.49	4.63	4.29	3.94	5.47	3.58	4.05	4.35	11.79	5.81	13.67	5.09	6.14	4.19	3.58	3.58	3.5	6.56	5.27	5.58	3.69	7.51	6.1	3.97	6.92
I1	5.28	3.45	6.51	5.38	14.34	14.44	5.36	11.68	14.73	4.48	4.33	3.97	5.2	3.54	3.92	4.35	11.02	5.76	10.31	4.91	4.75	3.95	3.5	3.56	3.84	5.38	4.53	5.26	3.59	6.38	5.6	4.02	6.67
E5	4.76	3.96	6.62	5.6	12.18	43.19	7.47	20.39	26.92	5.15	4.56	3.99	11.03	3.76	4.53	4.28	11.28	8.29	16.99	5.11	4.44	3.71	3.5	3.5	3.5	14.87	4.57	5.86	4.42	6.83	4.56	4.23	6.25
E4	5.36	3.79	5.97	6.41	9.08	33.7	8.6	27.91	37.92	5.57	4.85	3.93	14.18	3.89	4.9	5.52	12.2	10.53	13.27	4.6	6.98	3.77	3.5	3.5	3.5	11.7	5.38	9.6	3.85	13.03	5.15	3.59	10.68
E3	5.33	3.95	5.64	7.25	7.82	65.65	8.2	23.98	39.11	5.63	4.75	4	8.73	3.96	5.05	5.31	12.14	8.09	20.45	5.18	6.06	3.96	3.5	3.5	3.5	7.59	5.52	6.78	3.78	19.25	9.46	3.7	8.54
E2	6.17	3.92	5.83	5.98	7.82	33.28	7.34	28.83	50.28	5.85	4.91	4.15	38.22	4.03	5.23	4.29	11.86	8.17	24.46	5.34	5.74	3.81	3.5	3.5	3.5	10.46	5.24	6.04	3.91	8.35	4.35	3.54	11.34
E1	6.35	4.09	12.2	6.54	27.41	20.73	8.71	19.24	25.8	6.52	4.73	4.32	8.77	4	5.08	4.61	11.06	8.69	20.54	5.93	5.97	4.61	3.77	3.66	3.78	6.87	4.88	6.84	3.79	7.69	6.28	4.79	9.05
L_C,sp mass (fg)	Al	Ti	V	Cr	Fe	Mn	Ni	Cu	Zn	Y	Zr	Nb	Mo	Rh	Pd	Ag	Sn	Sb	Ba	La	Ce	Nd	Er	Hf	Ta	W	Pt	Au	Tl	Pb	Bi	Th	U
I5	28.07	11.07	0.41	0.43	70.54	1.9	1.77	1.18	2.32	0.1	0.18	0.11	0.66	0.05	0.27	0.07	0.21	0.09	1.88	0.07	0.06	0.17	0.13	0.18	0.06	0.22	0.06	0.11	0.09	0.2	0.12	0.07	0.16
I4	20.32	5.41	0.48	0.58	53.28	1.78	1.41	1.27	3.24	0.09	0.14	0.06	0.77	0.05	0.27	0.05	0.19	0.09	1.27	0.05	0.05	0.13	0.09	0.12	0.03	0.12	0.06	0.1	0.04	0.12	0.09	0.03	0.09
I3	17.22	5.5	0.33	0.47	28.23	1.42	1.15	1.03	3.04	0.07	0.12	0.05	0.47	0.04	0.23	0.05	0.18	0.1	1.77	0.06	0.04	0.13	0.09	0.12	0.03	0.08	0.05	0.09	0.05	0.19	0.09	0.04	0.12
I2	12.08	4.99	0.39	0.45	96.77	1.29	0.86	0.45	1.54	0.06	0.1	0.04	0.24	0.04	0.18	0.04	0.17	0.05	0.94	0.04	0.05	0.11	0.08	0.1	0.03	0.06	0.05	0.09	0.04	0.07	0.04	0.03	0.05
I1	9.6	5.56	0.32	0.32	21.73	0.64	0.82	0.44	1.07	0.07	0.13	0.06	0.31	0.05	0.24	0.06	0.21	0.07	0.96	0.05	0.05	0.15	0.12	0.16	0.05	0.08	0.06	0.12	0.07	0.09	0.07	0.06	0.11
E5	10.58	6.6	0.34	0.35	20.3	2.01	1.2	0.8	2	0.09	0.15	0.06	0.67	0.05	0.29	0.06	0.23	0.1	1.59	0.05	0.05	0.14	0.13	0.16	0.04	0.22	0.06	0.13	0.09	0.11	0.06	0.06	0.11
E4	10.11	4.62	0.25	0.37	12.44	1.3	1.15	0.88	2.21	0.06	0.11	0.04	0.58	0.04	0.21	0.05	0.17	0.09	0.87	0.03	0.05	0.1	0.08	0.1	0.03	0.11	0.05	0.16	0.04	0.12	0.04	0.03	0.09
E3	13.67	5.13	0.29	0.5	12.22	3.01	1.31	0.95	2.79	0.07	0.12	0.05	0.4	0.04	0.24	0.05	0.18	0.07	1.48	0.04	0.05	0.11	0.08	0.1	0.03	0.07	0.05	0.12	0.04	0.18	0.07	0.03	0.06
E2	15.43	4.96	0.29	0.4	11.85	1.48	1.14	1.11	3.53	0.08	0.12	0.05	1.75	0.04	0.24	0.04	0.18	0.07	1.76	0.04	0.05	0.1	0.08	0.1	0.03	0.1	0.05	0.11	0.04	0.08	0.03	0.03	0.09
E1	20.48	7.18	0.65	0.42	48.09	1	1.45	0.77	1.96	0.11	0.15	0.07	0.54	0.06	0.32	0.06	0.22	0.11	2	0.07	0.07	0.18	0.14	0.17	0.05	0.11	0.07	0.16	0.08	0.12	0.09	0.07	0.16
Estimated formula	Al2O3	TiO2	V2O3	Cr2O3	Fe2O3	MnO2	NiO	CuO	ZnO	Y2O3	ZrO2	Nb2O5	MoO2	Rh	Pd	Ag	SnO2	Sb2O3	BaO	La2O3	CeO2	Nd2o3	Er2O3	HfO2	TaO2	WO2	Pt	Au	Tl2O	PbO2	Bi2O3	ThO2	UO2
mol Element	2	1	2	2	2	1	1	1	1	2	1	2	1	1	1	1	2	2	1	2	1	2	2	1	1	1	1	1	2	1	2	1	1
AW (g/mole)	26.982	47.867	50.942	51.996	55.845	54.938	58.693	63.546	65.39	88.906	91.224	92.906	95.94	102.91	106.42	107.868	118.71	121.76	137.327	138.91	140.116	144.24	167.26	178.49	180.948	183.84	195.08	196.967	204.383	207.2	208.98	232.038	238.029
MW (gr/mole)	101.961	79.866	149.881	151.99	159.688	86.9368	74.692	79.545	81.39	225.81	123.223	265.81	127.94	102.91	106.42	107.868	150.709	291.518	153.33	325.809	172.115	336.48	382.56	210.49	212.947	215.84	195.08	196.967	424.766	239.2	465.959	264.037	270.028
Density (g/mL)	3.97	4.23	4.87	5.22	5.25	5.03	6.72	6.31	5.6	5.03	6.52	4.6	6.9	12.41	12	10.5	6.85	5.58	4.49	6.51	7.65	7.24	8.64	9.68	10	10.8	21.5	19.3	9.52	9.64	8.9	10	10.97
L_C,sp estimated Size (nm)	Al2O3	TiO2	V2O3	Cr2O3	Fe2O3	MnO2	NiO	CuO	ZnO	Y2O3	ZrO2	Nb2O5	MoO2	Rh	Pd	Ag	SnO2	Sb2O3	BaO	La2O3	CeO2	Nd2o3	Er2O3	HfO2	TaO2	WO2	Pt	Au	Tl2O	PbO2	Bi2O3	ThO2	UO2
I5	294.393	202.789	61.8442	61.2639	332.286	104.514	86.1849	76.4644	99.4917	36.3975	41.4511	40.2758	62.4551	19.7424	35.0263	23.3509	33.3721	33.2849	96.293	28.8784	26.4002	37.3983	32.0309	34.7274	23.8025	35.7463	17.4678	22.1622	26.5722	35.7637	30.6198	24.7781	31.6153
I4	264.335	159.733	65.1806	67.69	302.613	102.265	79.8938	78.361	111.209	35.1414	38.1202	32.9077	65.7481	19.7424	35.0263	20.8734	32.2772	33.2849	84.4909	25.8145	24.8435	34.1992	28.3358	30.3372	18.8921	29.2068	17.4678	21.4691	20.2784	30.1642	27.8199	18.6814	26.0979
I3	250.145	160.614	57.5275	63.1075	244.871	94.8457	74.6459	73.0765	108.872	32.3175	36.2109	30.9673	55.7723	18.3272	33.2034	20.8734	31.7007	34.4746	94.3771	27.432	23.0627	34.1992	28.3358	30.3372	18.8921	25.5145	16.4378	20.7282	21.8442	35.1574	27.8199	20.5615	28.7244
I2	222.264	155.488	60.8218	62.1994	369.216	91.8582	67.7547	55.4502	86.789	30.6989	34.0758	28.7475	44.5783	18.3272	30.5983	19.3772	31.1024	27.3625	76.4278	23.964	24.8435	32.3469	27.2449	28.5484	18.8921	23.1814	16.4378	20.7282	20.2784	25.2037	21.2306	18.6814	21.4543
I1	205.875	161.196	56.9405	55.5178	224.416	72.719	66.6875	55.0364	76.8692	32.3175	37.19	32.9077	48.5482	19.7424	33.6778	22.1813	33.3721	30.6101	76.966	25.8145	24.8435	35.8701	31.1876	33.3904	22.3991	25.5145	17.4678	22.8144	24.4369	27.406	25.5843	23.5371	27.9033
E5	212.655	170.678	58.1028	57.2011	219.381	106.493	75.7124	67.1731	94.6893	35.1414	39.007	32.9077	62.7689	19.7424	35.8707	22.1813	34.3996	34.4746	91.0628	25.8145	24.8435	35.0546	32.0309	33.3904	20.7934	35.7463	17.4678	23.4313	26.5722	29.3019	24.3029	23.5371	27.9033
E4	209.458	151.545	52.4426	58.2706	186.34	92.095	74.6459	69.3415	97.8938	30.6989	35.1757	28.7475	59.8222	18.3272	32.2117	20.8734	31.1024	33.2849	74.4815	21.7728	24.8435	31.3354	27.2449	28.5484	18.8921	28.3718	16.4378	25.1105	20.2784	30.1642	21.2306	18.6814	26.0979
E3	231.617	156.928	55.1024	64.4227	185.235	121.836	77.9585	71.1334	105.802	32.3175	36.2109	30.9673	52.8534	18.3272	33.6778	20.8734	31.7007	30.6101	88.9125	23.964	24.8435	32.3469	27.2449	28.5484	18.8921	24.4037	16.4378	22.8144	20.2784	34.5294	25.5843	18.6814	22.7986
E2	241.158	155.175	55.1024	59.8047	183.347	96.1631	74.4289	74.9215	114.432	33.7885	36.2109	30.9673	86.4435	18.3272	33.6778	19.3772	31.7007	30.6101	94.199	23.964	24.8435	31.3354	27.2449	28.5484	18.8921	27.4846	16.4378	22.1622	20.2784	26.3509	19.2892	18.6814	26.0979
E1	265.027	175.538	72.1122	60.7853	292.45	84.383	80.6422	66.3227	94.0538	37.5724	39.007	34.6428	58.4141	20.9794	37.0672	22.1813	33.8937	35.5874	98.2997	28.8784	27.7922	38.1177	32.832	34.072	22.3991	28.3718	18.3888	25.1105	25.5492	30.1642	27.8199	24.7781	31.6153
Average diameter L_C,sp	239.693	164.968	59.5177	61.0263	254.015	96.7172	75.8555	68.7281	99.0102	33.6392	37.2659	32.4039	59.7404	19.1585	34.0037	21.2143	32.4622	32.3584	87.551	25.6297	25.116	34.2204	29.3733	31.0448	20.2747	28.3542	17.0449	22.6531	22.6366	30.4206	25.1301	21.0599	27.0308
	Sample dilution (W/W)	Plasma uptake (mL/s)
I5	10	0.000247717
I4	10	0.000233943
I3	10	0.000174775
I2	100	0.00021247
I1	100	0.000217133
E5	10	0.000338809
E4	10	0.000222043
E3	10	0.000233732
E2	10	0.000136246
E1	10	0.000323026

## Sheet: Dissolved bkgd concentrations
Sensitivity cps/ppb
I5	104.041	133.767	5536.48	4226.06	200.651	6126.05	1766.22	6750.3	3403.64	15876.2	8283.67	16753.1	4396.98	18648.2	4238.44	20025.5	13195.9	21392.9	2846.27	25049.2	25482.7	7154.07	7421.61	5766.86	20909.8	17701.9	19782.7	11645.2	13602.2	16988.4	19064.3	17882.7	15566.6
I4	79.5408	159.082	4094.01	2978.1	133.348	4508.09	1293.71	5146.75	2884.52	16399.4	8578.7	17466.2	4606.35	19768.2	4505.75	21969.6	14155.9	23099.6	2975.76	26634.5	27219.3	7968.11	9516.82	7916.64	29156.4	25067	22016.4	12471.5	21235	22999	30267.6	30978.8	30962.4
I3	94.3785	136.325	4114.2	3039.34	127.586	4563.38	1317.8	5631.25	2985.16	15331.3	8013.44	16280.3	4287.23	18333.9	4175.38	19830	12947.3	21305.1	2626.87	23301	21937.8	6802.24	7566.01	6090.91	22268.1	19008.5	17669.8	10346.7	15409.9	18592.6	21804.9	21506.1	19809
I2	104.11	174.225	4725.33	3371.89	155.103	5216.13	1502.16	6100.01	3388.89	17596.7	9197.82	18682.5	4918.67	21032.4	4789.07	23301.6	14930.2	24434	3087.19	27531.8	26924.2	8150.34	9448.53	7755.15	28479.4	24414.9	22513.3	13054.1	20327	23754.1	28893.8	29157.2	27682.7
I1	119.423	134.622	4440.36	3604.4	143.308	4905.03	1411.36	5704.08	2983.4	13353.7	6967.79	14085.4	3695.6	15666.1	3560.98	16788.7	11147.6	17956.9	2338.52	20605.9	20404	5903.84	6196.97	4844.23	17587.8	14912.7	16714.9	9784	11568.8	14877.9	16245.9	15383.9	13143
E5	152.464	203.286	6603.4	5468.38	203.286	7297.96	2104.01	8629.48	4560.38	20162.6	10520	21267.1	5580.19	23655.7	5376.91	25258.2	16886.3	27114.9	3625.26	31919.2	32698.5	9117.36	9462.95	7355.55	26664.3	22574.9	25207.4	14846.6	17353.8	21694	24326.5	22825.6	19847.5
E4	117.683	182.075	5209.12	3819.14	162.091	5768.67	1665.32	7047.64	3808.03	19324.4	10100.7	20525.6	5406.74	23123.5	5266.85	24982	16375.7	26884.9	3388.37	30077.9	28930	8788.45	9803.19	7904.72	28905.5	24682.3	22874.8	13355.9	20048.2	24053.9	28379.3	28039.6	25925.7
E3	91.1554	179.974	4623.22	3389.11	149.588	5095.35	1463.16	5883.03	3279.26	18039.4	9438.09	19212.8	5067.31	21746.4	4955.11	23959.8	15417	25416	3230.17	28833.2	28660.2	8568.61	10043.5	8283.46	30455.3	26135.9	23471.3	13264.3	21903	24322.1	31165.8	31619.2	31074.6
E2	54.4984	107.634	2773.97	2024.62	89.9224	3057.36	878.787	3549.21	1940.14	10601.3	5545.21	11288	2975.61	12770.3	2910.22	14002	9012.68	14917.6	1897.91	16912.2	16698.3	5004.32	5795.91	4754.99	17458.6	14965.3	13511.5	7667.93	12451.5	13996.6	17695.6	17846.9	17374.1
E1	100.138	184.125	6066.44	5045.67	184.125	6712.49	1938.16	8078.89	4260.72	19100.6	9968.6	20160.1	5294.4	22456.8	5107.05	23881.3	16086.7	25780.7	3320.71	29253.3	28952.9	8369.62	8737.87	6812.63	24721.2	20945	23887.8	14177.6	16180.4	20454	22702.3	21407	18528.8
Lamda (dissolved background singal) cps
I5	4935.77	923.913	1210.47	760.87	126981	70963.4	1951.58	38053.4	43320.2	217.391	518.775	489.13	1472.33	4.94071	39.5257	286.561	3003.95	701.581	11269.8	686.759	558.3	123.518	9.88142	14.8221	64.2292	5503.95	49.4071	69.17	74.1107	4871.54	1852.77	113.636	879.447
I4	627.47	123.518	523.715	345.85	21383.4	24555.3	415.02	17875.5	38616.6	148.221	355.731	14.8221	2865.61	9.88142	79.0514	74.1107	2445.65	839.921	3344.86	113.636	148.221	19.7628	0	14.8221	0	2050.4	74.1107	79.0514	4.94071	2075.1	1709.49	9.88142	1472.33
I3	2252.96	350.791	607.708	869.565	12094.9	36788.5	662.055	33809.3	75360.7	247.036	405.138	74.1107	1398.22	14.8221	98.8142	192.688	3927.87	1729.25	12228.3	849.802	350.791	59.2885	4.94071	14.8221	14.8221	686.759	83.9921	83.9921	24.7036	9609.68	1823.12	34.585	2223.32
I2	296.443	59.2885	583.004	291.502	114461	16511.9	153.162	2613.64	11699.6	34.585	54.3478	9.88142	93.8735	0	9.88142	19.7628	1635.38	128.458	2193.68	64.2292	187.747	14.8221	0	0	0	212.451	79.0514	108.696	4.94071	410.079	182.806	9.88142	266.798
I1	370.553	24.7036	207.51	103.755	4382.41	2801.38	83.9921	2648.22	4061.26	29.6443	59.2885	9.88142	74.1107	0	9.88142	24.7036	1353.75	123.518	1002.96	291.502	261.858	9.88142	0	0	4.94071	88.9328	29.6443	79.0514	0	316.206	108.696	9.88142	232.213
E5	49.4071	9.88142	222.332	108.696	3611.66	51126.5	350.791	6576.09	16403.2	69.17	34.585	9.88142	1215.42	4.94071	29.6443	19.7628	1299.41	503.953	3819.17	64.2292	24.7036	4.94071	0	0	0	2732.21	34.585	133.399	24.7036	405.138	34.585	19.7628	177.866
E4	83.9921	4.94071	143.281	197.628	1151.19	20716.4	573.123	12356.7	24461.5	103.755	49.4071	9.88142	2411.07	4.94071	54.3478	98.8142	1615.61	1067.19	2030.63	34.585	276.68	4.94071	0	0	0	1437.75	88.9328	805.336	4.94071	2139.33	69.17	0	1111.66
E3	83.9921	9.88142	113.636	316.206	746.047	79377.5	489.13	8720.36	26170.9	108.696	44.4664	9.88142	602.767	9.88142	59.2885	83.9921	1595.85	469.368	5998.02	74.1107	153.162	9.88142	0	0	0	375.494	98.8142	247.036	4.94071	5192.69	770.751	4.94071	558.3
E2	167.984	9.88142	128.458	148.221	622.53	18339.9	335.968	13290.5	45059.3	133.399	54.3478	14.8221	24881.4	9.88142	74.1107	19.7628	1497.04	484.19	9145.26	83.9921	118.577	4.94071	0	0	0	1042.49	74.1107	153.162	4.94071	523.715	24.7036	0	1314.23
E1	805.336	88.9328	1793.48	345.85	31457.5	14708.5	597.826	8725.3	16828.1	207.51	123.518	24.7036	612.648	9.88142	64.2292	34.585	1368.58	587.945	6067.19	533.597	548.419	39.5257	4.94071	0	4.94071	261.858	49.4071	251.976	4.94071	592.885	207.51	44.4664	671.937
Concentration Dissolved Bkgd in Measured Samples (ng/mL)
I5	47.4405	6.90687	0.218636	0.180042	632.846	11.5839	1.10495	5.63729	12.7276	0.0136929	0.0626262	0.0291964	0.334851	0.000264944	0.00932552	0.0143098	0.227643	0.0327951	3.95948	0.0274164	0.021909	0.0172654	0.00133144	0.00257023	0.00307173	0.310925	0.00249749	0.00593979	0.00544845	0.286756	0.097185	0.00635454	0.0564959
I4	7.88866	0.776443	0.127922	0.116131	160.358	5.44695	0.320799	3.47316	13.3875	0.0090382	0.0414668	0.000848617	0.622101	0.000499864	0.0175446	0.00337332	0.172765	0.0363609	1.12404	0.00426652	0.00544545	0.00248024	0	0.00187227	0	0.0817965	0.00336616	0.00633855	0.000232668	0.0902257	0.0564791	0.000318974	0.0475522
I3	23.8716	2.5732	0.14771	0.286103	94.7979	8.06169	0.502393	6.00387	25.2451	0.0161132	0.0505574	0.00455217	0.326136	0.000808455	0.0236659	0.00971699	0.303373	0.0811661	4.65507	0.0364706	0.0159903	0.00871603	0.000653014	0.00243348	0.000665622	0.036129	0.00475344	0.00811778	0.00160309	0.516856	0.0836106	0.00160815	0.112238
I2	2.84739	0.340298	0.123379	0.0864505	737.971	3.16554	0.101961	0.428465	3.45234	0.00196542	0.00590878	0.000528914	0.0190851	0	0.00206333	0.000848134	0.109534	0.00525736	0.710575	0.00233291	0.00697318	0.00181859	0	0	0	0.00870168	0.00351132	0.00832653	0.000243062	0.0172635	0.00632684	0.000338901	0.00963774
I1	3.10286	0.183503	0.0467326	0.0287856	30.5804	0.571125	0.0595113	0.464268	1.36129	0.00221994	0.00850894	0.000701536	0.0200538	0	0.00277492	0.00147144	0.121439	0.00687858	0.428889	0.0141465	0.0128337	0.00167373	0	0	0.000280918	0.00596357	0.00177353	0.00807966	0	0.0212533	0.00669066	0.000642324	0.0176682
E5	0.324057	0.0486086	0.0336693	0.0198771	17.7664	7.00559	0.166725	0.762049	3.59689	0.00343062	0.00328754	0.000464635	0.217809	0.000208859	0.00551326	0.000782431	0.0769505	0.0185858	1.05349	0.00201224	0.000755495	0.000541901	0	0	0	0.121029	0.00137202	0.00898515	0.00142352	0.0186752	0.0014217	0.00086582	0.00896163
E4	0.713717	0.0271356	0.0275057	0.0517469	7.10209	3.59119	0.344151	1.75331	6.42365	0.00536912	0.00489144	0.000481419	0.445937	0.000213666	0.0103188	0.00395541	0.0986594	0.0396949	0.599294	0.00114985	0.00956378	0.000562182	0	0	0	0.0582502	0.0038878	0.0602983	0.000246441	0.0889389	0.00243734	0	0.0428787
E3	0.921416	0.0549049	0.0245795	0.0933004	4.98734	15.5784	0.334297	1.48229	7.98075	0.00602545	0.00471138	0.000514316	0.118952	0.000454393	0.0119651	0.00350554	0.103513	0.0184674	1.85687	0.00257033	0.00534407	0.00115321	0	0	0	0.014367	0.00420999	0.0186241	0.000225572	0.213496	0.0247307	0.000156256	0.0179664
E2	3.08237	0.0918055	0.0463085	0.0732096	6.92297	5.99861	0.382309	3.74464	23.2247	0.0125833	0.00980085	0.00131309	8.36178	0.000773779	0.0254657	0.00141143	0.166103	0.0324577	4.8186	0.00496636	0.00710114	0.00098729	0	0	0	0.0696607	0.005485	0.0199744	0.000396796	0.0374174	0.00139603	0	0.075643
E1	8.04224	0.483002	0.295639	0.0685438	170.849	2.19121	0.308451	1.08001	3.94958	0.0108641	0.0123907	0.00122537	0.115716	0.000440019	0.0125766	0.0014482	0.085075	0.0228056	1.82708	0.0182406	0.0189418	0.00472252	0.000565437	0	0.000199857	0.0125021	0.0020683	0.0177728	0.000305352	0.0289862	0.00914048	0.00207719	0.0362645
Dillution Factor
I5	10	10	10	10	10	10	10	10	10	10	10	10	10	10	10	10	10	10	10	10	10	10	10	10	10	10	10	10	10	10	10	10	10
I4	10	10	10	10	10	10	10	10	10	10	10	10	10	10	10	10	10	10	10	10	10	10	10	10	10	10	10	10	10	10	10	10	10
I3	10	10	10	10	10	10	10	10	10	10	10	10	10	10	10	10	10	10	10	10	10	10	10	10	10	10	10	10	10	10	10	10	10
I2	100	100	100	100	100	100	100	100	100	100	100	100	100	100	100	100	100	100	100	100	100	100	100	100	100	100	100	100	100	100	100	100	100
I1	100	100	100	100	100	100	100	100	100	100	100	100	100	100	100	100	100	100	100	100	100	100	100	100	100	100	100	100	100	100	100	100	100
E5	10	10	10	10	10	10	10	10	10	10	10	10	10	10	10	10	10	10	10	10	10	10	10	10	10	10	10	10	10	10	10	10	10
E4	10	10	10	10	10	10	10	10	10	10	10	10	10	10	10	10	10	10	10	10	10	10	10	10	10	10	10	10	10	10	10	10	10
E3	10	10	10	10	10	10	10	10	10	10	10	10	10	10	10	10	10	10	10	10	10	10	10	10	10	10	10	10	10	10	10	10	10
E2	10	10	10	10	10	10	10	10	10	10	10	10	10	10	10	10	10	10	10	10	10	10	10	10	10	10	10	10	10	10	10	10	10
E1	10	10	10	10	10	10	10	10	10	10	10	10	10	10	10	10	10	10	10	10	10	10	10	10	10	10	10	10	10	10	10	10	10
Concentration Dissolved Bkgd in WWTP Samples (ng/mL)
I5	474.405	69.0687	2.18636	1.80042	6328.46	115.839	11.0495	56.3729	127.276	0.136929	0.626262	0.291964	3.34851	0.00264944	0.0932552	0.143098	2.27643	0.327951	39.5948	0.274164	0.21909	0.172654	0.0133144	0.0257023	0.0307173	3.10925	0.0249749	0.0593979	0.0544845	2.86756	0.97185	0.0635454	0.564959
I4	78.8866	7.76443	1.27922	1.16131	1603.58	54.4695	3.20799	34.7316	133.875	0.090382	0.414668	0.00848617	6.22101	0.00499864	0.175446	0.0337332	1.72765	0.363609	11.2404	0.0426652	0.0544545	0.0248024	0	0.0187227	0	0.817965	0.0336616	0.0633855	0.00232668	0.902257	0.564791	0.00318974	0.475522
I3	238.716	25.732	1.4771	2.86103	947.979	80.6169	5.02393	60.0387	252.451	0.161132	0.505574	0.0455217	3.26136	0.00808455	0.236659	0.0971699	3.03373	0.811661	46.5507	0.364706	0.159903	0.0871603	0.00653014	0.0243348	0.00665622	0.36129	0.0475344	0.0811778	0.0160309	5.16856	0.836106	0.0160815	1.12238
I2	284.739	34.0298	12.3379	8.64505	73797.1	316.554	10.1961	42.8465	345.234	0.196542	0.590878	0.0528914	1.90851	0	0.206333	0.0848134	10.9534	0.525736	71.0575	0.233291	0.697318	0.181859	0	0	0	0.870168	0.351132	0.832653	0.0243062	1.72635	0.632684	0.0338901	0.963774
I1	310.286	18.3503	4.67326	2.87856	3058.04	57.1125	5.95113	46.4268	136.129	0.221994	0.850894	0.0701536	2.00538	0	0.277492	0.147144	12.1439	0.687858	42.8889	1.41465	1.28337	0.167373	0	0	0.0280918	0.596357	0.177353	0.807966	0	2.12533	0.669066	0.0642324	1.76682
E5	3.24057	0.486086	0.336693	0.198771	177.664	70.0559	1.66725	7.62049	35.9689	0.0343062	0.0328754	0.00464635	2.17809	0.00208859	0.0551326	0.00782431	0.769505	0.185858	10.5349	0.0201224	0.00755495	0.00541901	0	0	0	1.21029	0.0137202	0.0898515	0.0142352	0.186752	0.014217	0.0086582	0.0896163
E4	7.13717	0.271356	0.275057	0.517469	71.0209	35.9119	3.44151	17.5331	64.2365	0.0536912	0.0489144	0.00481419	4.45937	0.00213666	0.103188	0.0395541	0.986594	0.396949	5.99294	0.0114985	0.0956378	0.00562182	0	0	0	0.582502	0.038878	0.602983	0.00246441	0.889389	0.0243734	0	0.428787
E3	9.21416	0.549049	0.245795	0.933004	49.8734	155.784	3.34297	14.8229	79.8075	0.0602545	0.0471138	0.00514316	1.18952	0.00454393	0.119651	0.0350554	1.03513	0.184674	18.5687	0.0257033	0.0534407	0.0115321	0	0	0	0.14367	0.0420999	0.186241	0.00225572	2.13496	0.247307	0.00156256	0.179664
E2	30.8237	0.918055	0.463085	0.732096	69.2297	59.9861	3.82309	37.4464	232.247	0.125833	0.0980085	0.0131309	83.6178	0.00773779	0.254657	0.0141143	1.66103	0.324577	48.186	0.0496636	0.0710114	0.0098729	0	0	0	0.696607	0.05485	0.199744	0.00396796	0.374174	0.0139603	0	0.75643
E1	80.4224	4.83002	2.95639	0.685438	1708.49	21.9121	3.08451	10.8001	39.4958	0.108641	0.123907	0.0122537	1.15716	0.00440019	0.125766	0.014482	0.85075	0.228056	18.2708	0.182406	0.189418	0.0472252	0.00565437	0	0.00199857	0.125021	0.020683	0.177728	0.00305352	0.289862	0.0914048	0.0207719	0.362645
